# Supplementary material
Source: Springer Nature journal article supplement (https://www.springermedizin.de/resource/supplementary/12891_2010_1036_MOESM2_ESM.PDF/9507398)
Supplement: MOESM2 [file 9507398]

## STRENGTH EXERCISES LEVEL 1

|     | Picture                                                                             | Description                                                                                                                                                                                                                                                                                                                                               |
|-----|-------------------------------------------------------------------------------------|-----------------------------------------------------------------------------------------------------------------------------------------------------------------------------------------------------------------------------------------------------------------------------------------------------------------------------------------------------------|
| 1 A |    | <p>Stand in front of worktop with hands resting on surface for support. Place feet shoulder width apart</p> <p>Slowly bend knees until both knee caps are directly in line with first 3 toes.</p> <p>Slowly straighten up again</p> <p>Repeat <input type="text"/> <input type="text"/> <input type="text"/> times</p>                                    |
| 1 B |   | <p>Stand beside a worktop with hand resting on surface for support.</p> <p>Step forward with ..... foot into a lunge position, keeping the knee cap in line with your toes</p> <p>Hold this position for _____ seconds</p> <p>Step back so feet are together again</p> <p>Repeat <input type="text"/> <input type="text"/> <input type="text"/> times</p> |
| 1 C |  | <p>Sit up straight in a chair</p> <p>Slowly straighten ..... leg</p> <p>Toes should point towards the ceiling</p> <p>Hold this position for _____ seconds</p> <p>Lower your leg again slowly.</p> <p>Repeat <input type="text"/> <input type="text"/> <input type="text"/> times</p>                                                                      |

## STRENGTH EXERCISES LEVEL 1

1 D

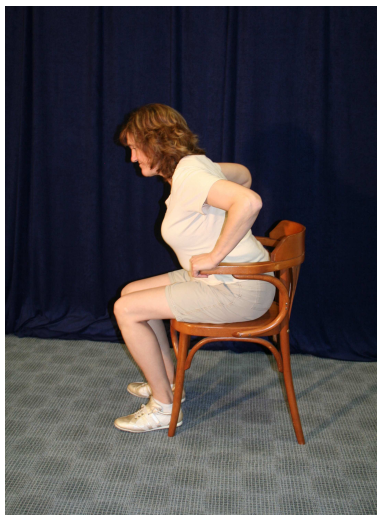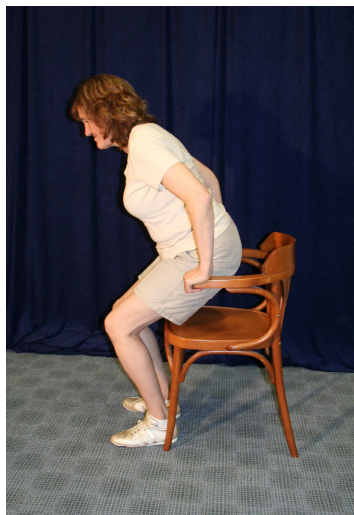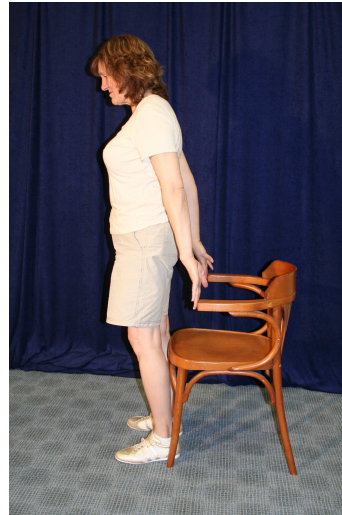

Sit in a chair.

Stand up slowly, using your hands to assist you.

Lower yourself down to the chair again slowly

Repeat    times

## STRENGTH EXERCISES LEVEL 2

|     | Picture                                                                             | Description                                                                                                                                                                                                                                                                                                          |
|-----|-------------------------------------------------------------------------------------|----------------------------------------------------------------------------------------------------------------------------------------------------------------------------------------------------------------------------------------------------------------------------------------------------------------------|
| 2 A |    | <p>Place feet shoulder width apart</p> <p>Look straight ahead</p> <p>Slowly bend knees until both knee caps are directly in line with first three toes.</p> <p>Slowly straighten up again</p> <p>Repeat <input type="text"/> <input type="text"/> <input type="text"/> times</p>                                     |
| 2 B |   | <p>Step forward with ..... foot into a lunge position, keeping the knee cap in line with your toes</p> <p>Hold this position for _____ seconds</p> <p>Step back so feet are together again</p> <p>Repeat <input type="text"/> <input type="text"/> <input type="text"/> times</p>                                    |
| 2 C |  | <p>Stand beside worktop with hand lightly resting on surface for support</p> <p>Look straight ahead</p> <p>Stand on ..... leg</p> <p>Slowly bend knee until knee cap is directly over toes.</p> <p>Slowly straighten up again</p> <p>Repeat <input type="text"/> <input type="text"/> <input type="text"/> times</p> |



## STRENGTH EXERCISES LEVEL 2

|     | Picture                                                                             | Description                                                                                                                                                                                                                                                                                                                                   |
|-----|-------------------------------------------------------------------------------------|-----------------------------------------------------------------------------------------------------------------------------------------------------------------------------------------------------------------------------------------------------------------------------------------------------------------------------------------------|
| 2 D |    | <p>Stand leaning with your back against the wall and your feet approximately 12 inches from the wall</p> <p>Keeping your feet in line with your hips, slowly slide down the wall into a half sitting position until your knee caps are directly over your toes</p> <p>Hold this position for _____ seconds, then return to standing again</p> |
| 2 E |   | <p>Sit up straight in a chair<br/>Slowly straighten your ..... leg<br/>Toes should point towards the ceiling</p> <p>Hold this position for _____ seconds</p> <p>Lower your leg again slowly</p> <p>Repeat <input type="text"/> <input type="text"/> <input type="text"/> times</p>                                                            |
| 2 F |  | <p>Stand at the bottom of the stairs holding onto the stair rail or wall for support</p> <p>Step up onto the bottom step with your ..... leg</p> <p>Step down slowly with the opposite leg.<br/>Look straight ahead as you step up and down</p> <p>Repeat <input type="text"/> <input type="text"/> <input type="text"/> times</p>            |



|     |                                                                                                                                                                                                                                                                                                                                                                                                                                                                                                                                                                                                                                                                                                                                                                                                                                                                                                                                     |                                                                                                                                                          |
|-----|-------------------------------------------------------------------------------------------------------------------------------------------------------------------------------------------------------------------------------------------------------------------------------------------------------------------------------------------------------------------------------------------------------------------------------------------------------------------------------------------------------------------------------------------------------------------------------------------------------------------------------------------------------------------------------------------------------------------------------------------------------------------------------------------------------------------------------------------------------------------------------------------------------------------------------------|----------------------------------------------------------------------------------------------------------------------------------------------------------|
| 2 G |                                                                                                                                                                                                                                                                                                                                                                                                                                                                                                                                                                                                                                                                                                                                                                                                                                                    | <p>Sit in a chair. Stand up slowly, using one hand to assist you.</p> <p>Repeat <input type="text"/> <input type="text"/> <input type="text"/> times</p> |
| 2 H | <div style="display: flex; justify-content: space-around; align-items: flex-start;">    </div> <p>Sit in a chair, with the .....TheraBand securely tied to the back leg of the chair as shown above</p> <p>Attach the velcro ankle cuff around your ankle, with the buckle at the back of the lower leg (see first picture above)</p> <p>Keeping your thigh flat on the chair, slowly straighten your knee. Hold your knee straight for _____ seconds.</p> <p>Slowly return to the starting position</p> <p>Repeat <input type="text"/> <input type="text"/> <input type="text"/> times</p> <p>Release your leg from the theraband ankle cuff before standing up again</p> |                                                                                                                                                          |

## STRENGTH EXERCISES LEVEL 3

|     | Picture                                                                             | Description                                                                                                                                                                                                                                                                                                                                                    |
|-----|-------------------------------------------------------------------------------------|----------------------------------------------------------------------------------------------------------------------------------------------------------------------------------------------------------------------------------------------------------------------------------------------------------------------------------------------------------------|
| 3 A |    | <p>Stand beside worktop with hand lightly resting on surface for support</p> <p>Step forward with ..... foot into a lunge position, keeping the knee cap in line with your toes</p> <p>Hold this position for _____ seconds</p> <p>Step back so feet are together again</p> <p>Repeat <input type="text"/> <input type="text"/> <input type="text"/> times</p> |
| 3 B |   | <p>Stand on ..... leg</p> <p>Look straight ahead</p> <p>Slowly bend knee until kneecap is in line with your toes.</p> <p>Slowly straighten up again</p> <p>Repeat <input type="text"/> <input type="text"/> <input type="text"/> times</p>                                                                                                                     |
| 3 C |  | <p>Stand leaning with your back against the wall and your feet approximately 12 inches from the wall</p> <p>Keeping your feet in line with your hips, slowly slide down the wall into a half sitting position until your knee caps are in line with your toes</p> <p>Hold this position for _____ seconds, then return to standing again</p>                   |

## STRENGTH EXERCISES LEVEL 3

|     | Picture                                                                             | Description                                                                                                                                                                                                                                                                                                    |
|-----|-------------------------------------------------------------------------------------|----------------------------------------------------------------------------------------------------------------------------------------------------------------------------------------------------------------------------------------------------------------------------------------------------------------|
| 3 D |    | <p>Sit up straight in a chair</p> <p>Slowly straighten your ..... leg</p> <p>Toes should point towards the ceiling</p> <p>Hold this position for _____ seconds</p> <p>Lower your leg again slowly</p>                                                                                                          |
| 3 E |  | <p>Stand at the bottom of the stairs. Step up onto the bottom step with your ..... leg, without holding onto the support</p> <p>Step down slowly with the opposite leg.<br/>Look straight ahead as you step up and down</p> <p>Repeat <input type="text"/> <input type="text"/> <input type="text"/> times</p> |



## STRENGTH EXERCISES LEVEL 3

|     | Picture and Description                                                                                                                                                                                                                                                                                                                                                                                                                                                                                                                                                                                                                                                                                                                                                                                                                                                                                |
|-----|--------------------------------------------------------------------------------------------------------------------------------------------------------------------------------------------------------------------------------------------------------------------------------------------------------------------------------------------------------------------------------------------------------------------------------------------------------------------------------------------------------------------------------------------------------------------------------------------------------------------------------------------------------------------------------------------------------------------------------------------------------------------------------------------------------------------------------------------------------------------------------------------------------|
| 3 F | <div style="display: flex; justify-content: space-around;">    </div> <p>Sit in a chair. Stand up slowly, without using your hands to assist you.</p> <p>Lower yourself down to chair again slowly</p> <p>Repeat <input type="text"/> <input type="text"/> <input type="text"/> times</p>                                                                                                                                                                                                                                                                                                                                                        |
| 3 G | <div style="display: flex; justify-content: space-around;">    </div> <p>Sit in a chair, with the .....TheraBand securely tied to the back leg of the chair as shown above</p> <p>Attach the velcro ankle cuff around your ankle, with the buckle at the back of the lower leg (see first picture above)</p> <p>Keeping your thigh flat on the chair, slowly straighten your knee. Hold your knee straight for _____ seconds. Slowly return to the starting position</p> <p>Repeat <input type="text"/> <input type="text"/> <input type="text"/> times</p> <p>Release your leg from the theraband ankle cuff before standing up again</p> |

## STRENGTH EXERCISES LEVEL 4

|     | Picture                                                                             | Description                                                                                                                                                                                                                                                                                                                                                      |
|-----|-------------------------------------------------------------------------------------|------------------------------------------------------------------------------------------------------------------------------------------------------------------------------------------------------------------------------------------------------------------------------------------------------------------------------------------------------------------|
| 4 A |    | <p>Step forward with ..... foot into a lunge position, keeping the knee cap in line with your toes</p> <p>Hold this position for _____ seconds</p> <p>Step back so feet are together again</p> <p>Repeat <input type="text"/> <input type="text"/> <input type="text"/> times</p>                                                                                |
| 4 B |   | <p>Stand with ..... leg on a step/stairs</p> <p>Bend this knee so that the other leg lowers to the floor - do not let it touch the floor</p> <p>Keep your body weight directly over the leg you are standing on and look straight ahead</p> <p>Slowly straighten up again</p> <p>Repeat <input type="text"/> <input type="text"/> <input type="text"/> times</p> |
| 4 C |  | <p>Stand leaning with your back against the wall and your feet approximately 12 inches from the wall</p> <p>Keeping your feet in line with your hips, slowly slide down the wall into a half sitting position until your knee caps are in line with your toes</p> <p>Hold this position for _____ seconds, then return to standing again</p>                     |

## STRENGTH EXERCISES LEVEL 4

|     | Picture                                                                            | Description                                                                                                                                                                                                                                                                                                                                                            |
|-----|------------------------------------------------------------------------------------|------------------------------------------------------------------------------------------------------------------------------------------------------------------------------------------------------------------------------------------------------------------------------------------------------------------------------------------------------------------------|
| 4 D |   | <p>Stand with feet hip width apart.</p> <p>Slowly squat down bending knees to a right angle. Keep your weight over your heels and your back straight and do not let your knees come closer together.</p> <p>Hold this position for _____ seconds, then return to standing again</p> <p>Repeat <input type="text"/> <input type="text"/> <input type="text"/> times</p> |
| 4 E |  | <p>Stand at the bottom of the stairs. Step up onto the bottom step with your ..... leg, without holding onto the stair-rail.</p> <p>Step down slowly with the opposite leg.</p> <p>Look straight ahead as you step up and down</p> <p>Repeat <input type="text"/> <input type="text"/> <input type="text"/> times</p>                                                  |



## STRENGTH EXERCISES – LEVEL 4

|     | Picture and Description                                                                                                                                                                                                                                                                                                                                                                                                                                                                                                                                                                                                                                                                                                                                                                                                                                                                                |
|-----|--------------------------------------------------------------------------------------------------------------------------------------------------------------------------------------------------------------------------------------------------------------------------------------------------------------------------------------------------------------------------------------------------------------------------------------------------------------------------------------------------------------------------------------------------------------------------------------------------------------------------------------------------------------------------------------------------------------------------------------------------------------------------------------------------------------------------------------------------------------------------------------------------------|
| 4 F | <div style="display: flex; justify-content: space-around;">    </div> <p>Sit in a chair. Stand up slowly, without using your hands to assist you.</p> <p>Lower yourself down to chair again slowly</p> <p>Repeat <input type="text"/> <input type="text"/> <input type="text"/> times</p>                                                                                                                                                                                                                                                                                                                                                        |
| 4 G | <div style="display: flex; justify-content: space-around;">    </div> <p>Sit in a chair, with the .....TheraBand securely tied to the back leg of the chair as shown above</p> <p>Attach the velcro ankle cuff around your ankle, with the buckle at the back of the lower leg (see first picture above)</p> <p>Keeping your thigh flat on the chair, slowly straighten your knee. Hold your knee straight for _____ seconds. Slowly return to the starting position</p> <p>Repeat <input type="text"/> <input type="text"/> <input type="text"/> times</p> <p>Release your leg from the theraband ankle cuff before standing up again</p> |
